# Supplementary material
Source: Springer Nature journal article supplement (https://www.springermedizin.de/resource/supplementary/13075_2009_2770_MOESM5_ESM.pdf/9692850)

**A** Immunostaining of micromass cultures of human MPC for type II collagen cultured in the presence of various concentrations of PPS for 5 days.

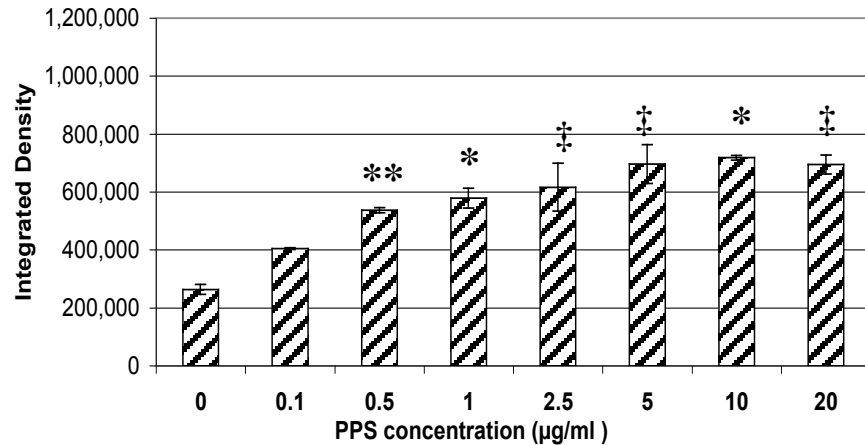

**B** Immunostaining of micromass cultures of human MPC for type II collagen cultured in the presence of various concentrations of PPS for 7 days.

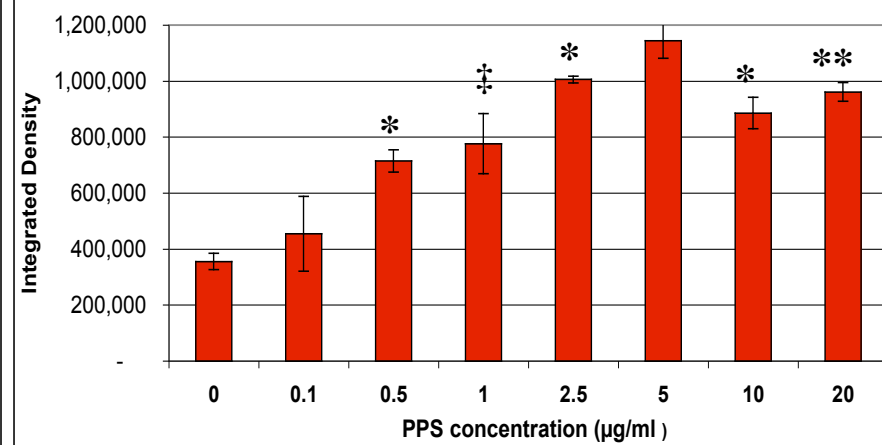

**C** Immunostaining of micromass cultures of human MPC for type II collagen cultured in the presence of various concentrations of PPS for 10 days.

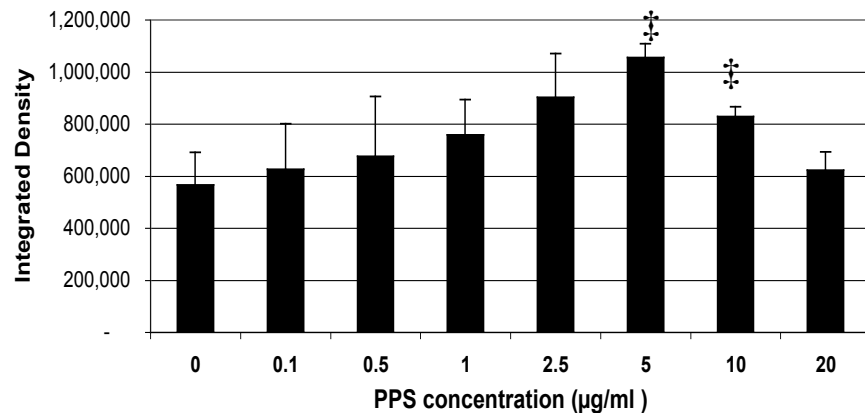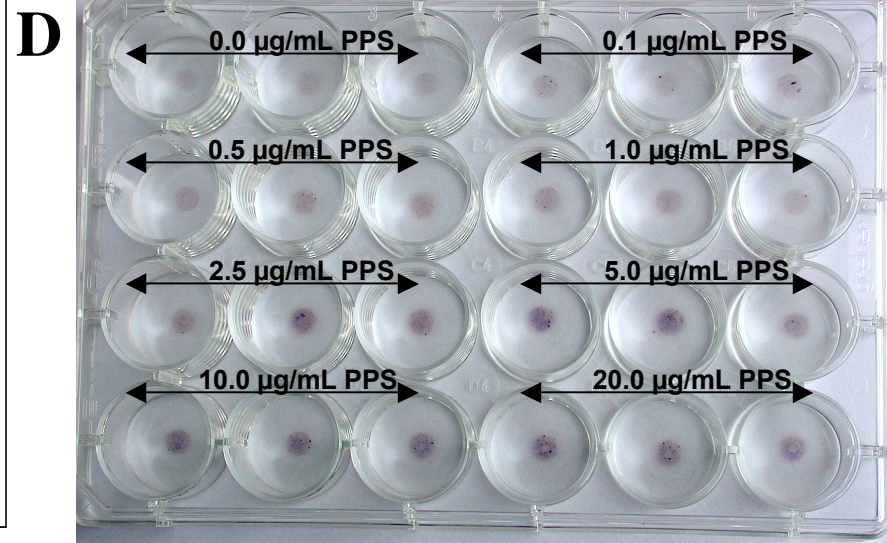

Supplement: MOESM5 [file 9692850]
